# Supplementary material for: Non-volatile organic transistor memory devices using the poly(4-vinylpyridine)-based supramolecular electrets
Source: Royal Society of Chemistry journal article supplement (doi:10.1039/c4cc09667c), 2014-12-23
Supplement: c4cc09667c1.pdf [file c4cc09667c1.pdf]

Supporting Information

## **Non-volatile Organic Transistor Memory Devices Using the Poly(4-vinylpyridine)-based Supramolecular Electrets**

Y.-H. Chou, Y.-C. Chiu, W.-Y. Lee, and W.-C. Chen\*

<sup>a</sup>Department of Chemical Engineering, National Taiwan University, Taipei 10617,  
Taiwan.

E-mail: chenwc@ntu.edu.tw

## Experimental

### Materials

Poly(4-vinylpyridine) (P4VP) ( $M_w \sim 60000$ ), Phenol, 2-Naphthol, and 2-Hydroxyanthracene were purchased from Aldrich.

### Sample preparation

The complexes of P4VP(Phenol)<sub>x</sub> (P4VP(2-Naphthol)<sub>x</sub> and P4VP(2-Hydroxyanthracene)<sub>x</sub>) with different molar ratio  $x$  of Phenol (2-Naphthol and 2-Hydroxyanthracene) to the repeating unit of P4VP were prepared from chloroform solution. In each case, Phenol (2-Naphthol and 2-Hydroxyanthracene) and chloroform were first mixed together until a clear solution was obtained. P4VP was subsequently added, followed by mechanical stirring for about 12 h at room temperature.

### Fabrication of the Pentacene Memory Devices.

The transistor-type memory devices based on a pentacene thin film were fabricated on a wafer with a thermally grown 300-nm thick SiO<sub>2</sub> dielectric on highly doped *n*-type Si as a gate electrode. The solution of P4VP(Phenol)<sub>x</sub>, P4VP(2-Naphthol)<sub>x</sub>, or P4VP(2-Hydroxyanthracene)<sub>x</sub> in chloroform was spin-coated at 1000 rpm for 60 s on a wafer. Thereafter, the polymer thin films were dried under vacuum ( $10^{-6}$  torr) at 100 °C for 1 h to remove residue solvents. The thickness of the prepared thin film was estimated to be 65~70 nm. The thin film of pentacene was prepared by thermal deposition with a deposition rate of 0.3~0.4 nm s<sup>-1</sup> at 90 °C under vacuum ( $10^{-7}$  torr) to form a 50-nm-thick film. The top-contact source and drain electrodes were defined by 80 nm-thick gold through a regular shadow mask, and the channel length ( $L$ ) and width ( $W$ ) were 50 and 1000 μm, respectively. The current-voltage ( $I$ - $V$ ) characteristics of the devices were measured by using a Keithley 4200-SCS semiconductor parameter analyzer in a N<sub>2</sub>-filled glove box.

### Characterization

Atomic force microscopy (AFM) measurements were obtained with a NanoScope IIIa AFM at room temperature. Commercial silicon cantilevers with typical spring constants of 21-78 Nm<sup>-1</sup> was used to operate the AFM in tapping mode.

The morphology of the thin film was determined using a field emission scanning electron microscope (SEM, JEOL JSM-6330F). The FE-SEM images were taken using a microscope operated at an accelerating voltage of 10 kV. Before imaging, the samples were sputtered with Pt. Infrared spectra were obtained using a Bruker VECTOR22 FTIR spectrometer. Samples were prepared by casting one drop of the

chloroform solution (~10 mg/ml) directly on potassium bromide crystals. The FTIR measurements were taken at room temperature. The electrical characterization of the memory device was performed by a Keithley 4200-SCS semiconductor parameter analyzer in a glove box. For the capacitance measurement, metal-insulator-semiconductor (MIS) structure was fabricated by depositing gold electrodes on the polymer-coated n-type Si(300) wafers. The capacitance of the bilayer dielectrics was measured on the MIS structure using Keithley 4200-SCS equipped with a digital capacitance meter (model 4210-CVU).

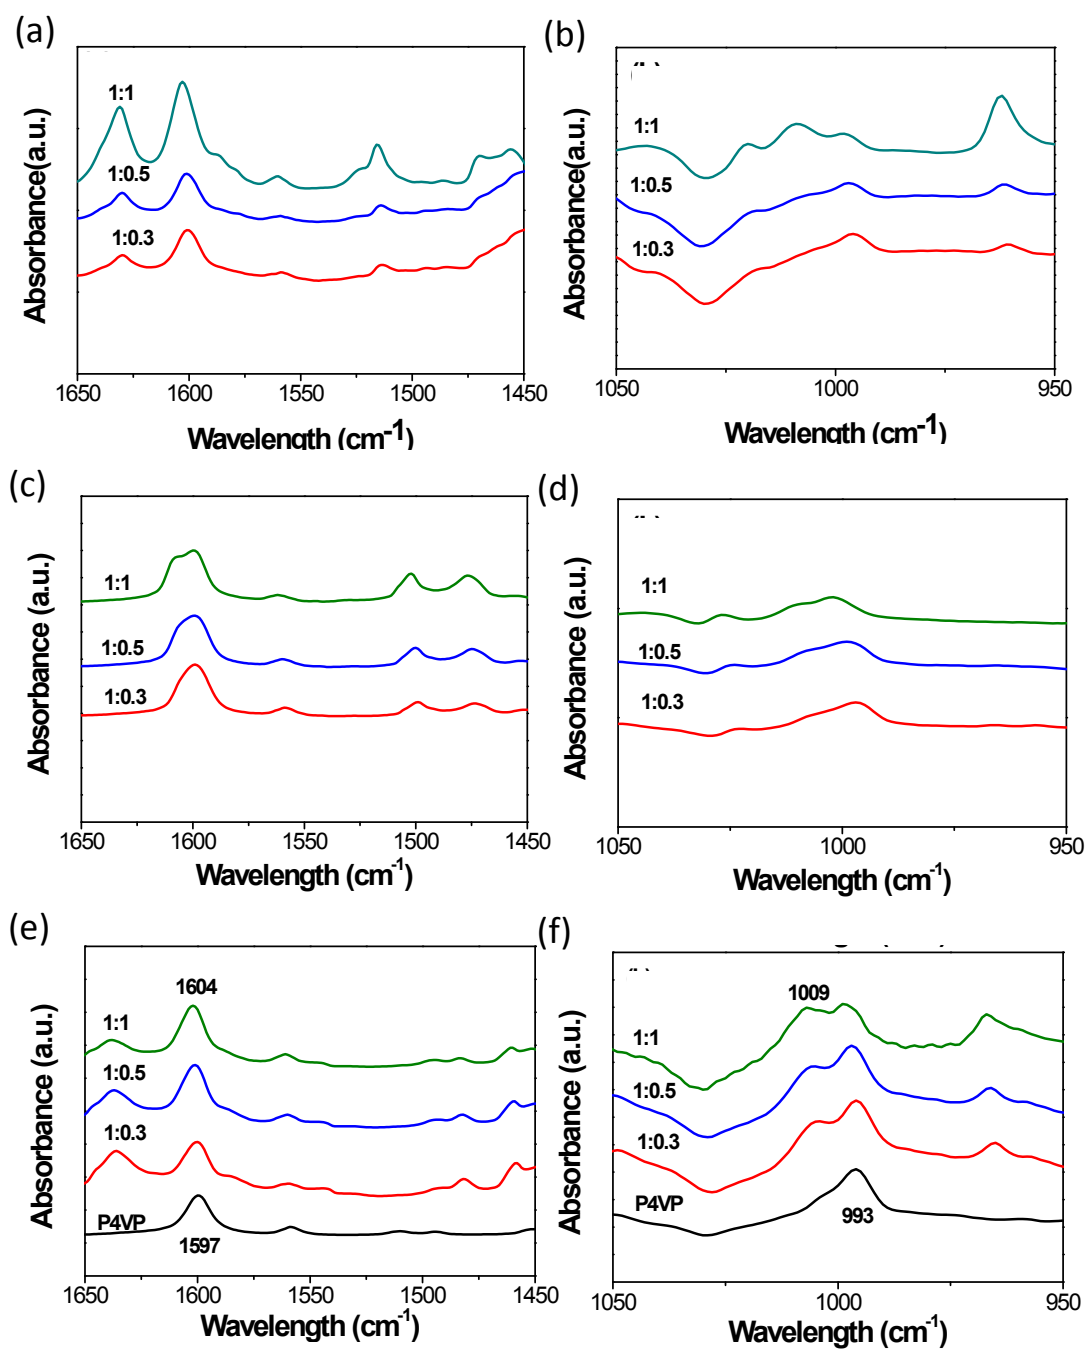

**Figure S1.** FTIR spectra of (a, b) P4VP(Phenol)<sub>x</sub>, (c,d) P4VP(2-Naphthol)<sub>x</sub> and (e,f) P4VP(2-Hydroxyanthracene)<sub>x</sub>: (a, c, e) 1450-1650cm<sup>-1</sup> region; (b, d, f) 950-1050 cm<sup>-1</sup> region, respectively.

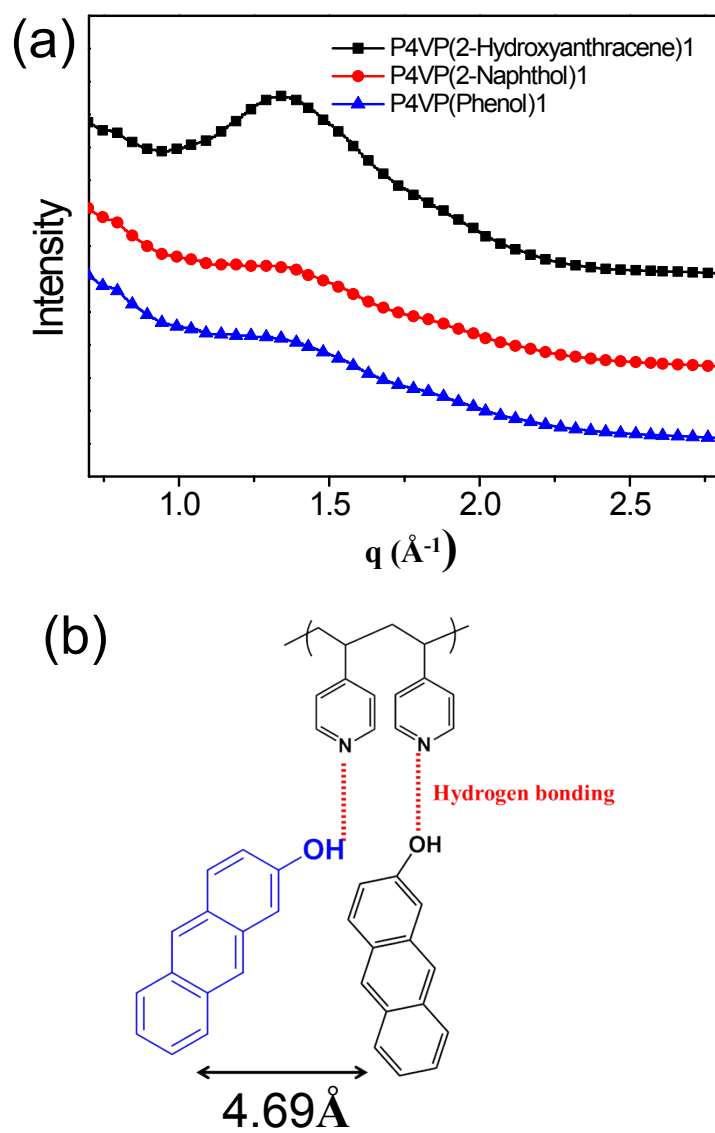

**Figure S2.** X-ray diffraction diagrams of the pentacene thin film with supramolecular polymer as electrets

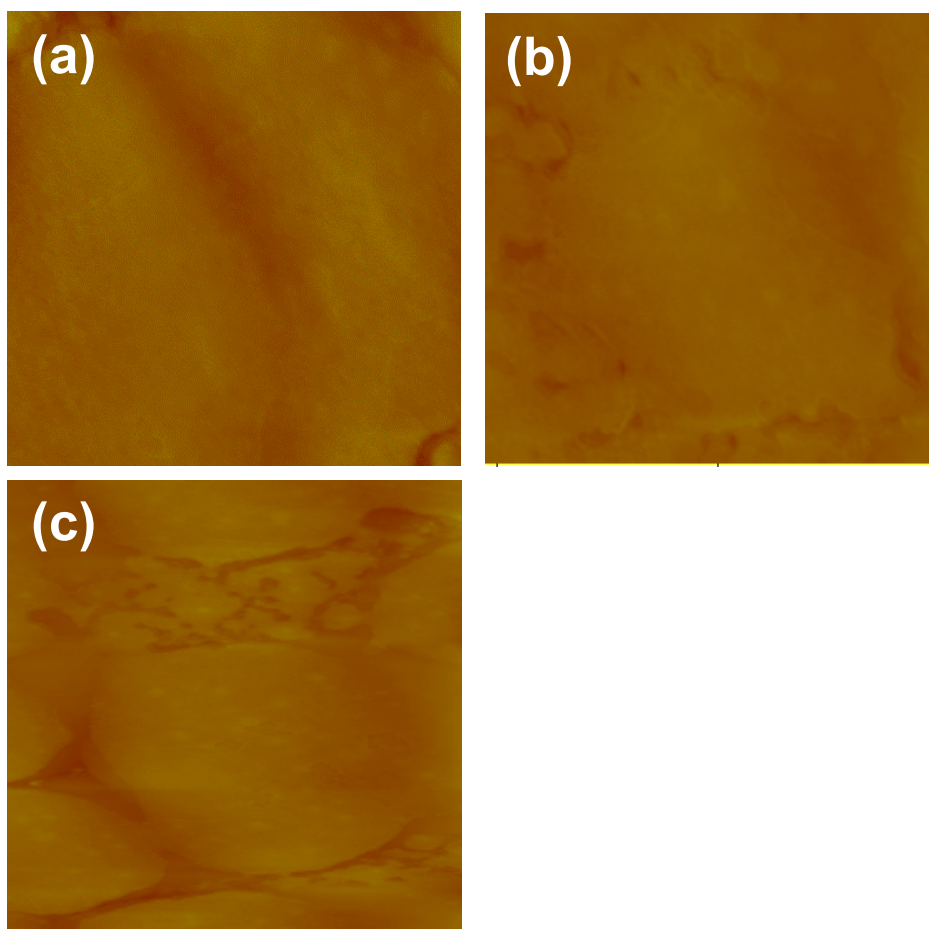

**Figure S3.** AFM topographic images of (a) P4VP(2-Hydroxyanthracene)<sub>0.3</sub>, (b) P4VP(2-Hydroxyanthracene)<sub>0.5</sub>, and (c) P4VP(2-Hydroxyanthracene)<sub>1</sub> on 3  $\mu\text{m}$  x 3  $\mu\text{m}$  area.

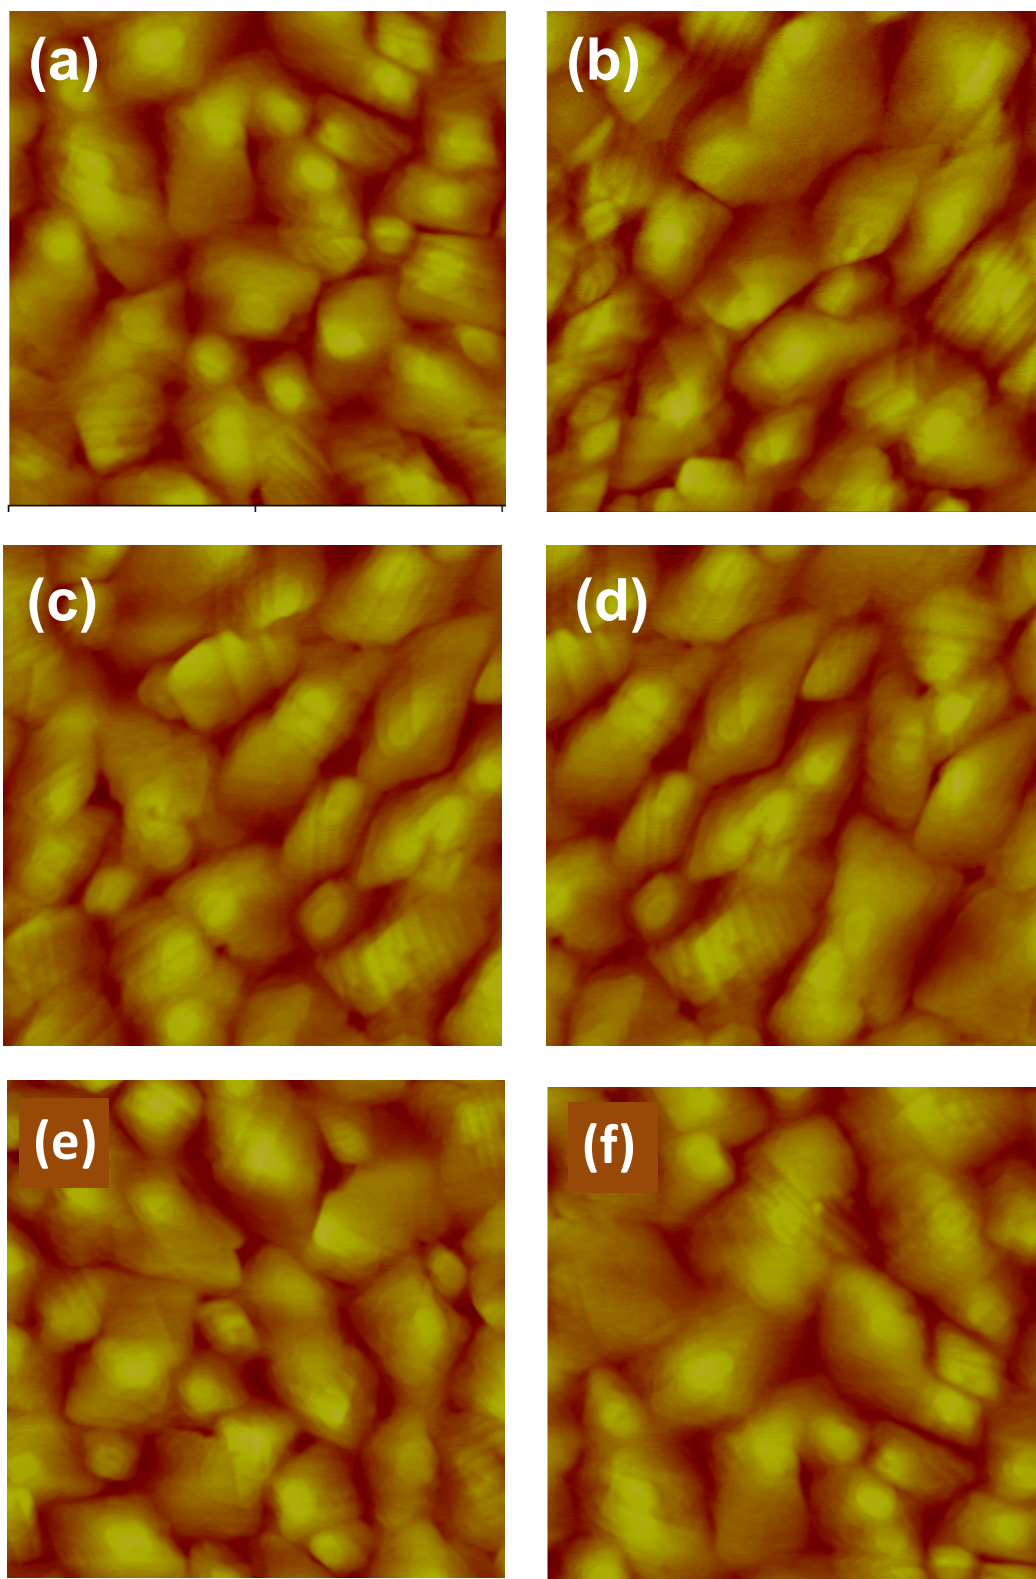

**Figure. S4.** AFM topographic images of Pentacene on P4VP surface with different supramolecular electrets: (a) P4VP, (b) P4VP(Phenol)<sub>1</sub>, (c) P4VP(2-Naphthol)<sub>1</sub>, (d) P4VP(2-Hydroxyanthracene)<sub>1</sub>, (e) P4VP(2-Hydroxyanthracene)<sub>0.3</sub> and (f) P4VP(2-Hydroxyanthracene)<sub>0.5</sub>, on 3  $\mu\text{m}$  x 3  $\mu\text{m}$  area, respectively.

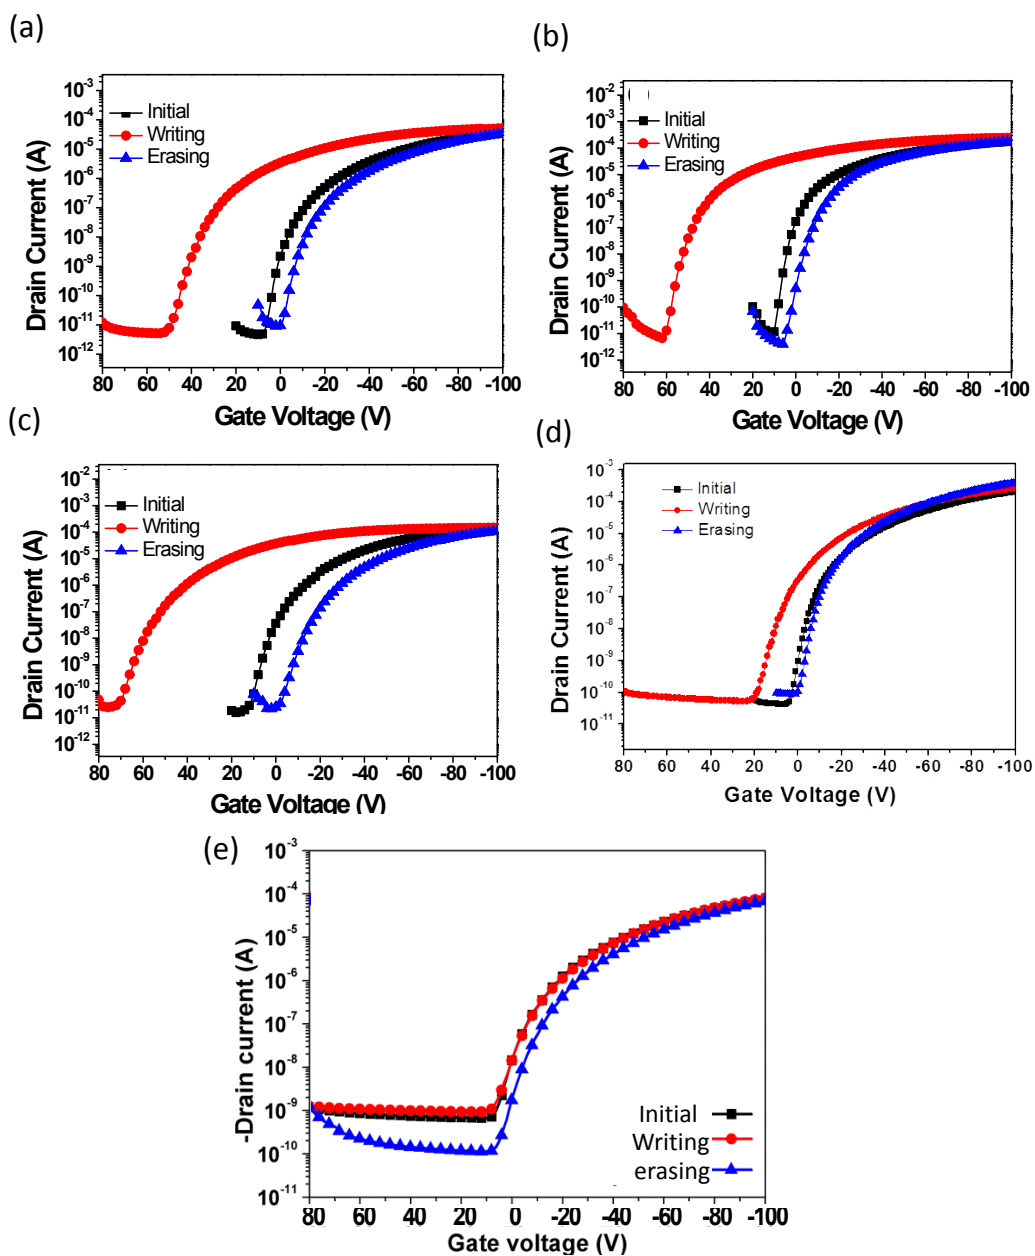

**Figure S5.** Shifts in transfer curves for Pentacene OFET memory device with (a) P4VP(2-hydroxyanthracene)<sub>0.3</sub>, (b) P4VP(2-hydroxyanthracene)<sub>0.5</sub>, (c) P4VP(2-hydroxyanthracene)<sub>1</sub>, (d) pure 2-hydroxyanthracene, and (e) P4VP-only as polymer electrets, respectively.



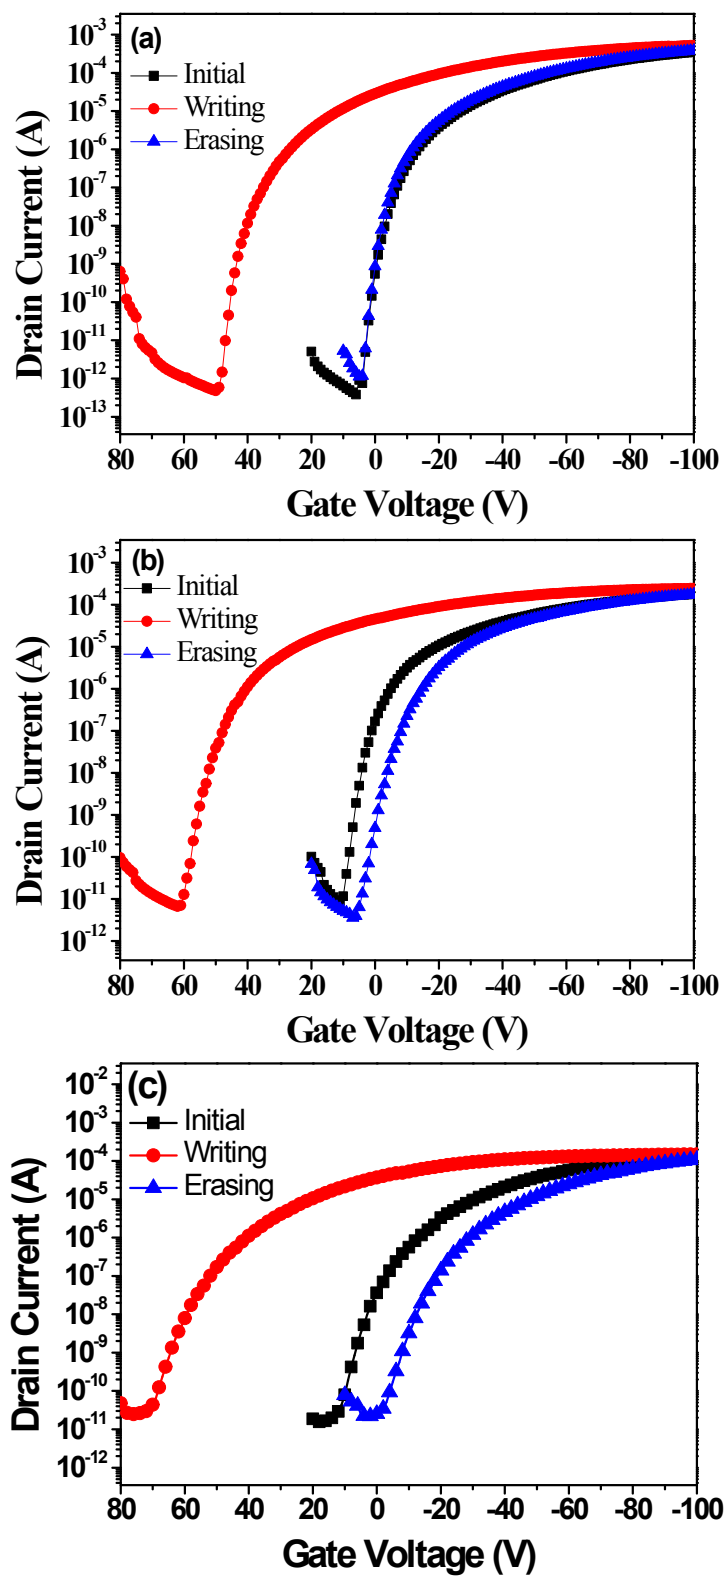

**Figure S6.** Shifts in transfer curves for Pentacene OFET memory device with (a) P4VP(Phenol)<sub>1</sub>, (b) P4VP(2-Naphthol)<sub>1</sub> and (c) P4VP(2-Hydroxyanthracene)<sub>1</sub> as polymer electrets.

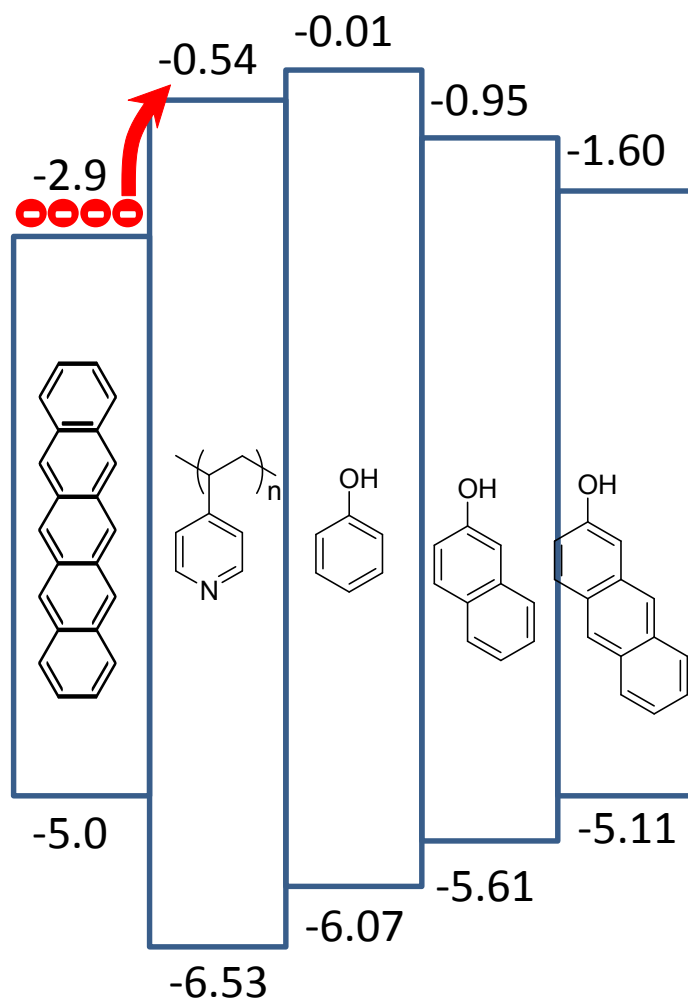

**Figure S7.** Energy diagram of pentacene/supramolecular electrets and the schematic charge trapping mechanism. Note that the energy levels of P4VP, phenol, 2-naphthol and 2-hydroxyanthracene were calculated by Gaussian 03 using density functional theory (DFT) method and Becke's three-parameter functional with the Lee, Yang, and Parr correlation functional method (B3LYP) with 6-31G.

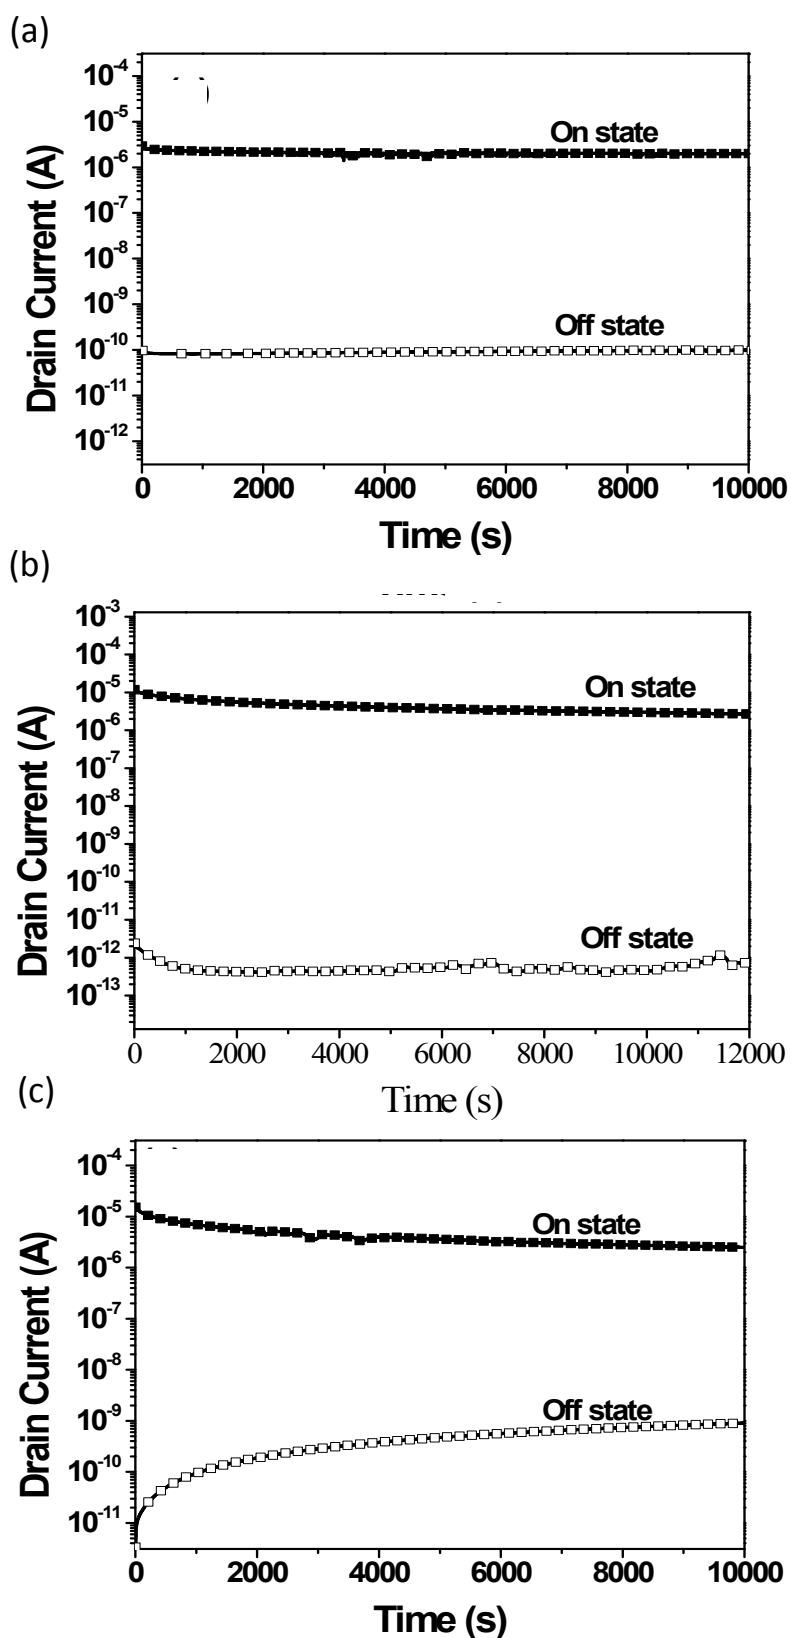

**Figure S8.** Retention time testing of the OFET memory devices based on Pentacene thin film with (a) P4VP(phenol)<sub>1</sub>, (b) P4VP(naphthol)<sub>1</sub>, and (c) P4VP(2-hydroxyanthracene)<sub>1</sub> as polymer electrets, respectively.

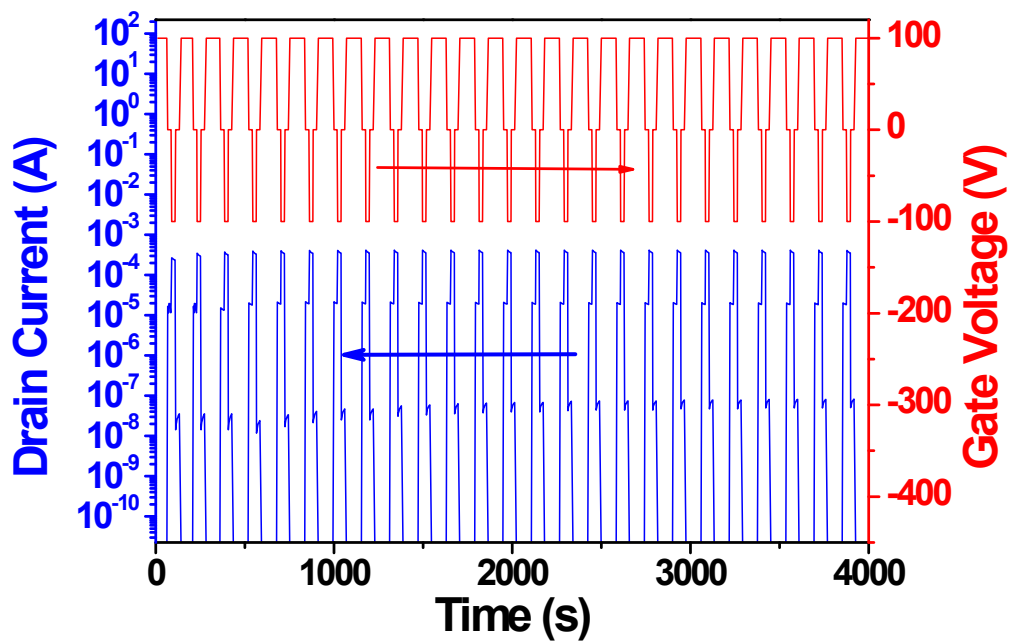

**Figure S9.** Reversible current response to the WRER cycles of Pentacene OFET memory device with P4VP(2-Naphthol)<sub>1</sub> as electret. The drain current was measured at  $V_d=100\text{V}$ . The writing, reading and erasing were at the gate voltages of -100, 0 and 100 V, respectively.
